# Supplementary material
Source: PubMed Central journal article supplement (PMC3413159)
Supplement: supp_dev.082271_DEV082271TableS1-S2.pdf [file supp_dev.082271_DEV082271TableS1-S2.pdf]

**Table S1. Quantification of cytoskeletal recruitment in the leading zone of the pLLp**

|                 | <b>Par3-tagRFP</b> |        |           | <b><math>\gamma</math>-tubulin</b> |        |           | <b>F-actin</b> |        |           |
|-----------------|--------------------|--------|-----------|------------------------------------|--------|-----------|----------------|--------|-----------|
|                 | DMSO               | SU5402 | PD0325901 | DMSO                               | SU5402 | PD0325901 | DMSO           | SU5402 | PD0325901 |
| Mean            | 11.8%              | 13.5%  | 11%       | 10.2%                              | 10.1%  | 11.3%     | 19.2%          | 15.36% | 21.3%     |
| s.e.m.          | 0.52%              | 0.97%  | 0.88%     | 0.62%                              | 0.7%   | 0.71%     | 0.39%          | 1%     | 0.92%     |
| <i>P</i> -value |                    | 0.67   |           |                                    | 0.88   |           |                | 0.156  |           |
|                 | <b>Myosin II</b>   |        |           | <b>Cadherin 2</b>                  |        |           |                |        |           |
|                 | DMSO               | SU5402 | PD0325901 | DMSO                               | SU5402 | PD0325901 |                |        |           |
| Mean            | 17.7%              | 18.9%  | 16.1%     | 17.6%                              | 19%    | 16.5%     |                |        |           |
| s.e.m.          | 0.51%              | 0.45%  | 1.2%      | 1.13%                              | 0.55%  | 0.93%     |                |        |           |
| <i>P</i> -value |                    | 0.369  |           |                                    | 0.407  |           |                |        |           |

To calculate means, cells were counted from  $n=6$  pLLps in each condition. Data were analyzed using one-way ANOVA.

**Table S2. Pairwise comparisons between Rockout and Ras-MAPK synergy conditions**

|                                          | DMSO            | 10 $\mu$ M Rockout | 36°C HS         | 0.5 $\mu$ M PD0325901 | 36°C HS/10 $\mu$ M Rockout | 10 $\mu$ M Rockout/0.5 $\mu$ M PD0325901 |
|------------------------------------------|-----------------|--------------------|-----------------|-----------------------|----------------------------|------------------------------------------|
| Mean $\pm$ s.e.m.                        | 22.7 $\pm$ 4.4% | 23.3 $\pm$ 6.6%    | 24.5 $\pm$ 4.5% | 24.3 $\pm$ 3.8%       | 33.4 $\pm$ 6.0%            | 32.1 $\pm$ 7.1%                          |
| DMSO                                     |                 | 0.9996             | 0.9546          | 0.971                 | 0.0002                     | 0.0014                                   |
| 10 $\mu$ M Rockout                       |                 |                    | 0.9948          | 0.9977                | 0.0008                     | 0.0048                                   |
| 36°C HS                                  |                 |                    |                 | 1                     | 0.0028                     | 0.0166                                   |
| 0.5 $\mu$ M PD0325901                    |                 |                    |                 |                       | 0.0022                     | 0.0132                                   |
| 36°C HS/10 $\mu$ M Rockout               |                 |                    |                 |                       |                            | 0.9912                                   |
| 10 $\mu$ M Rockout/0.5 $\mu$ M PD0325901 |                 |                    |                 |                       |                            |                                          |

To calculate means, cells were counted from  $n=10$  pLLps in each condition. *P*-values were derived from Tukey-Kramer post-hoc tests. Heat shock (HS) conditions were 40 minutes at 36°C.
