# Supplementary material
Source: PubMed Central journal article supplement (PMC3413159)

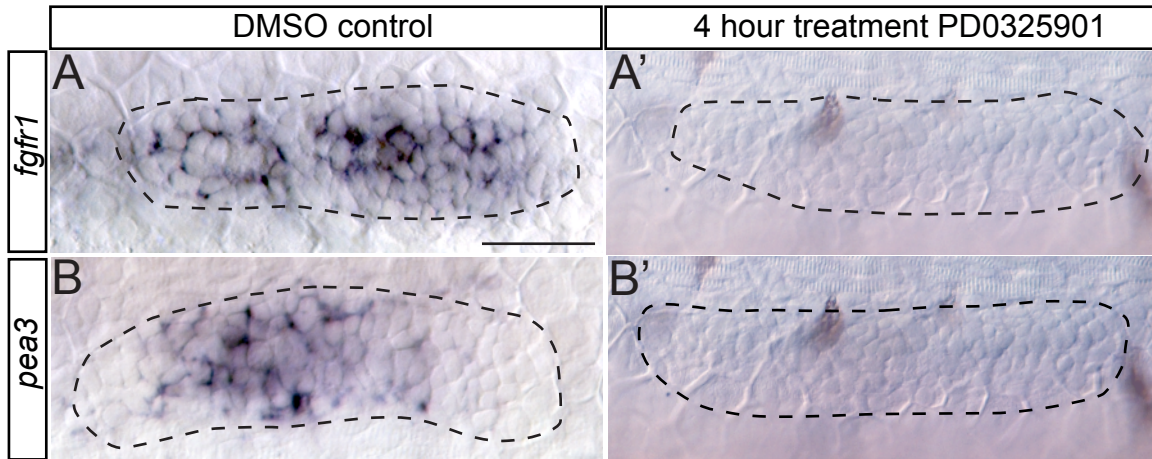

Supplement: supp_dev.082271_DEV082271FigS1.pdf [file supp_dev.082271_DEV082271FigS1.pdf]

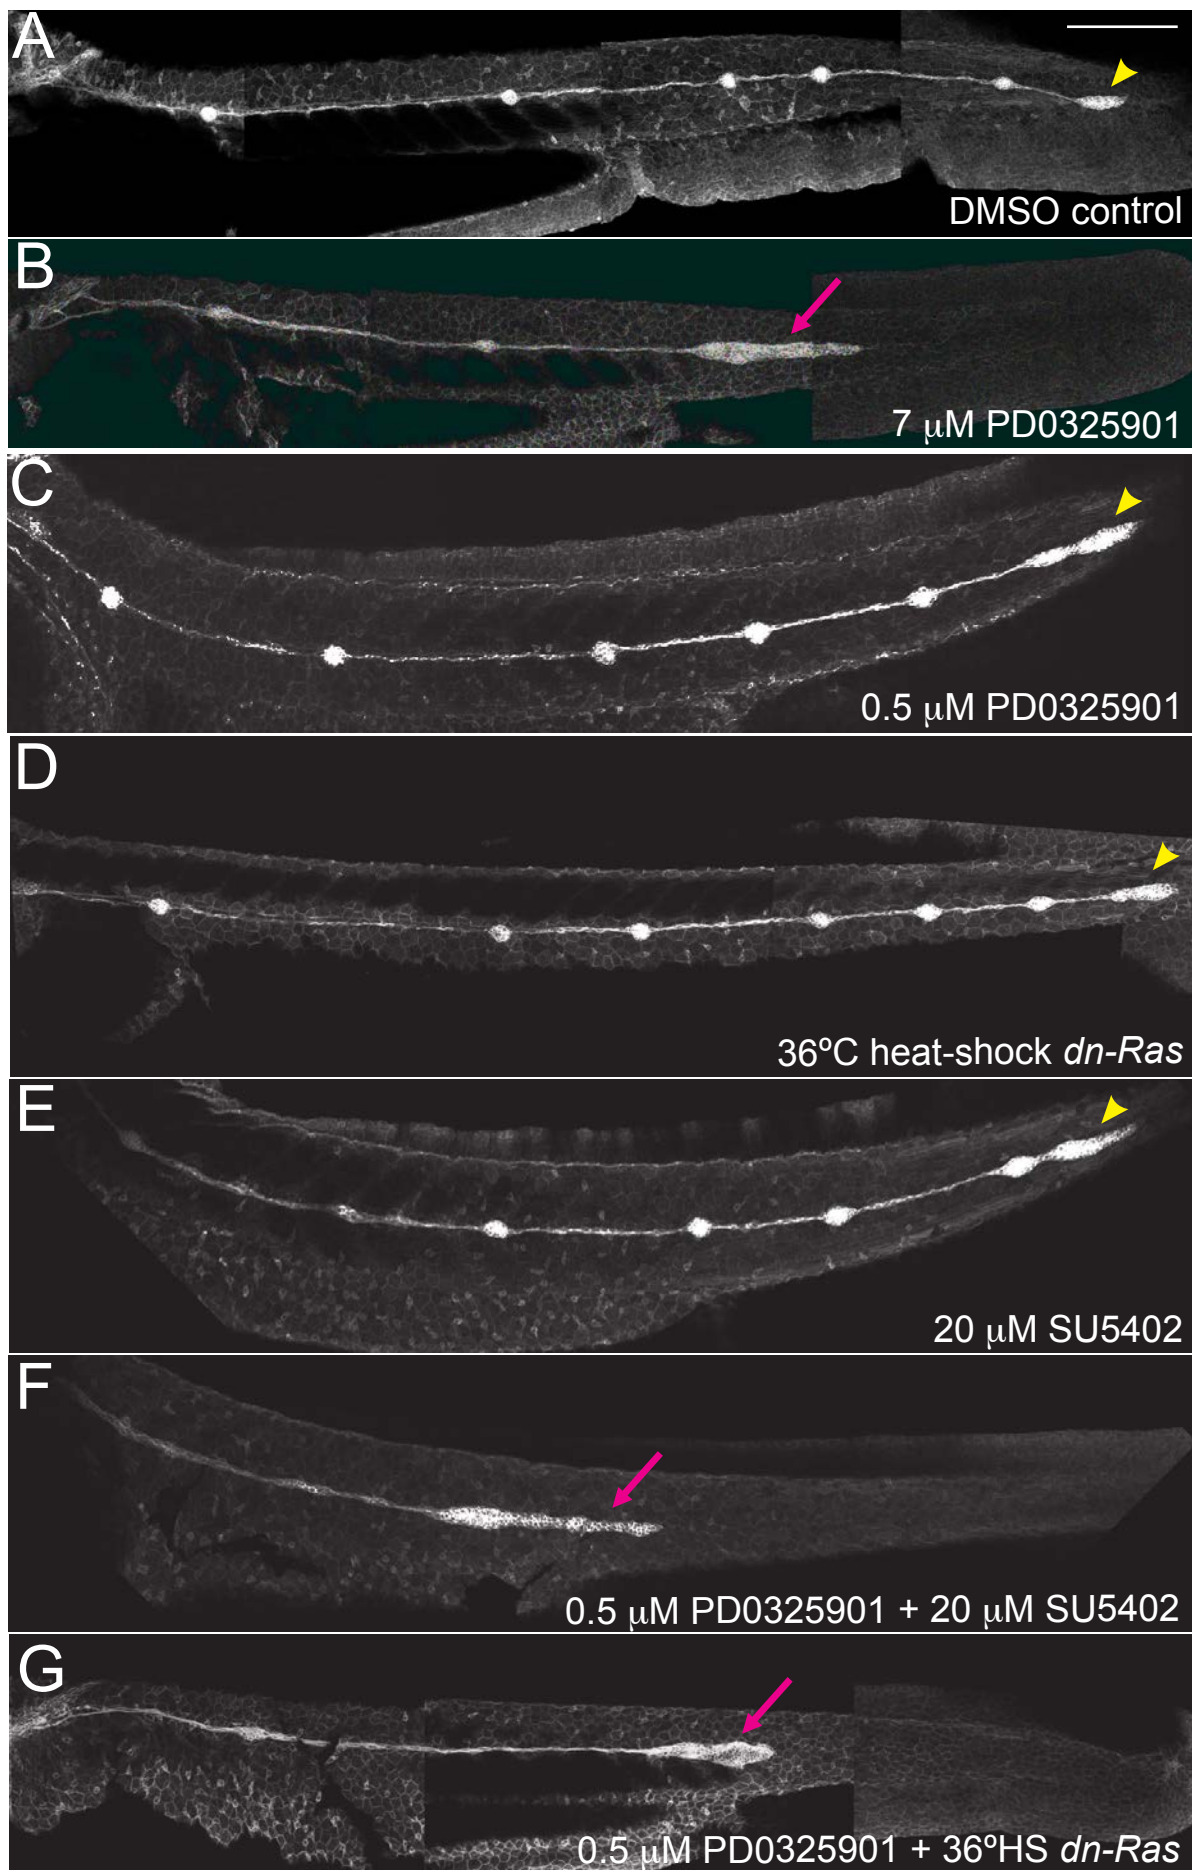

Supplement: supp_dev.082271_DEV082271FigS2.pdf [file supp_dev.082271_DEV082271FigS2.pdf]

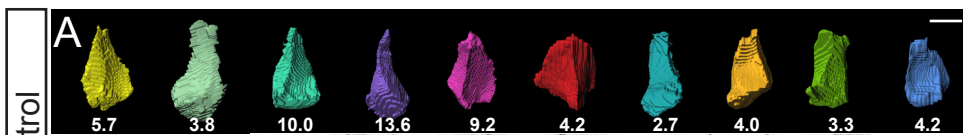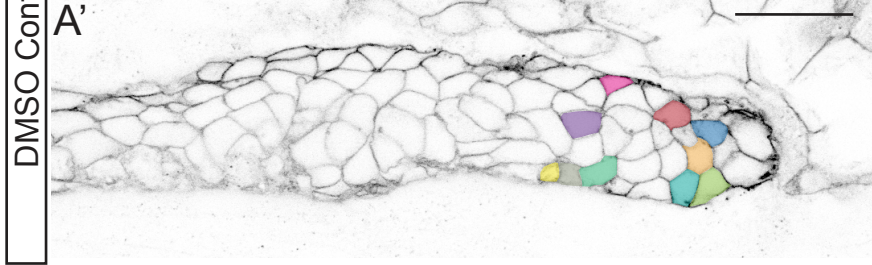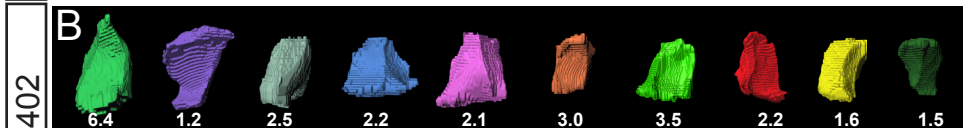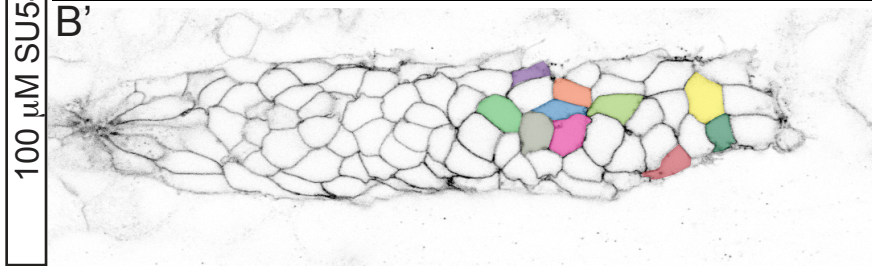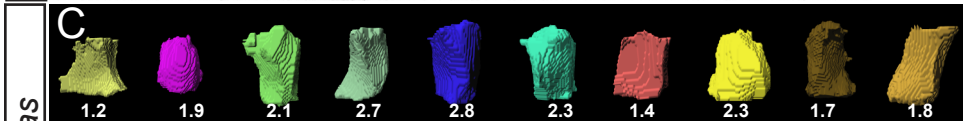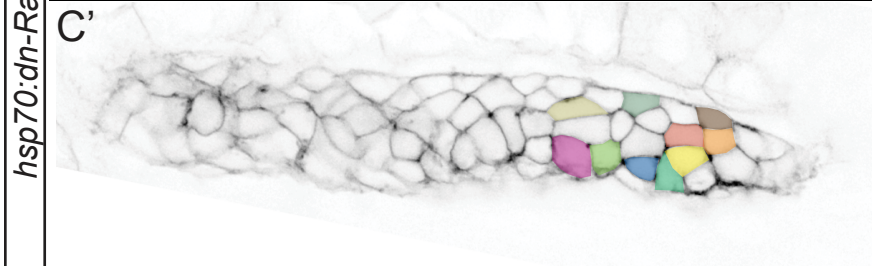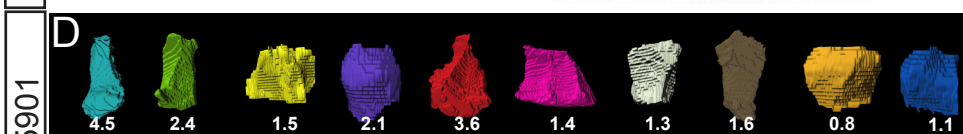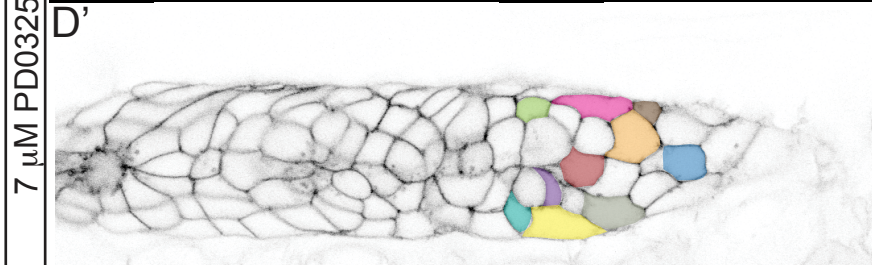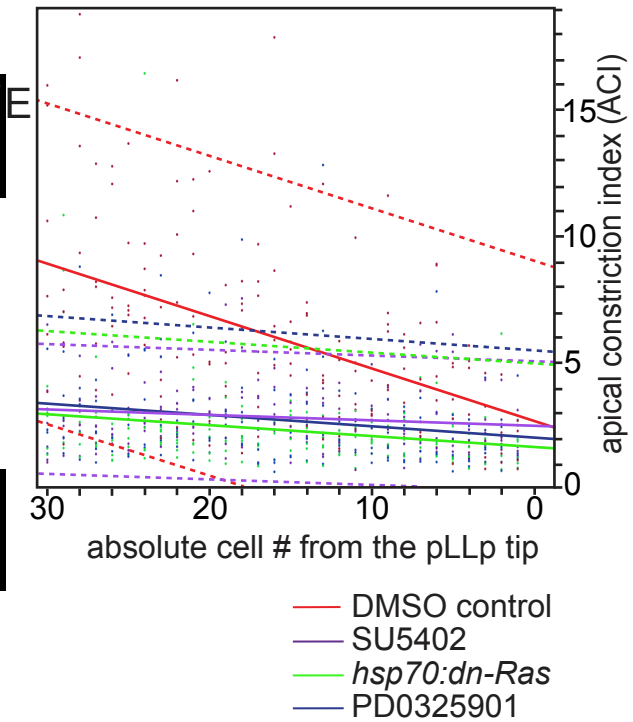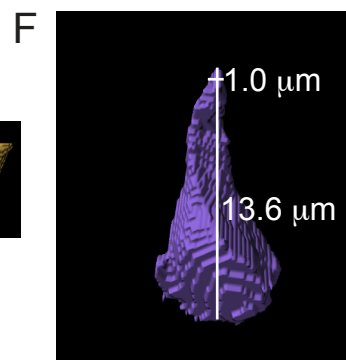

Supplement: supp_dev.082271_DEV082271FigS3.pdf [file supp_dev.082271_DEV082271FigS3.pdf]

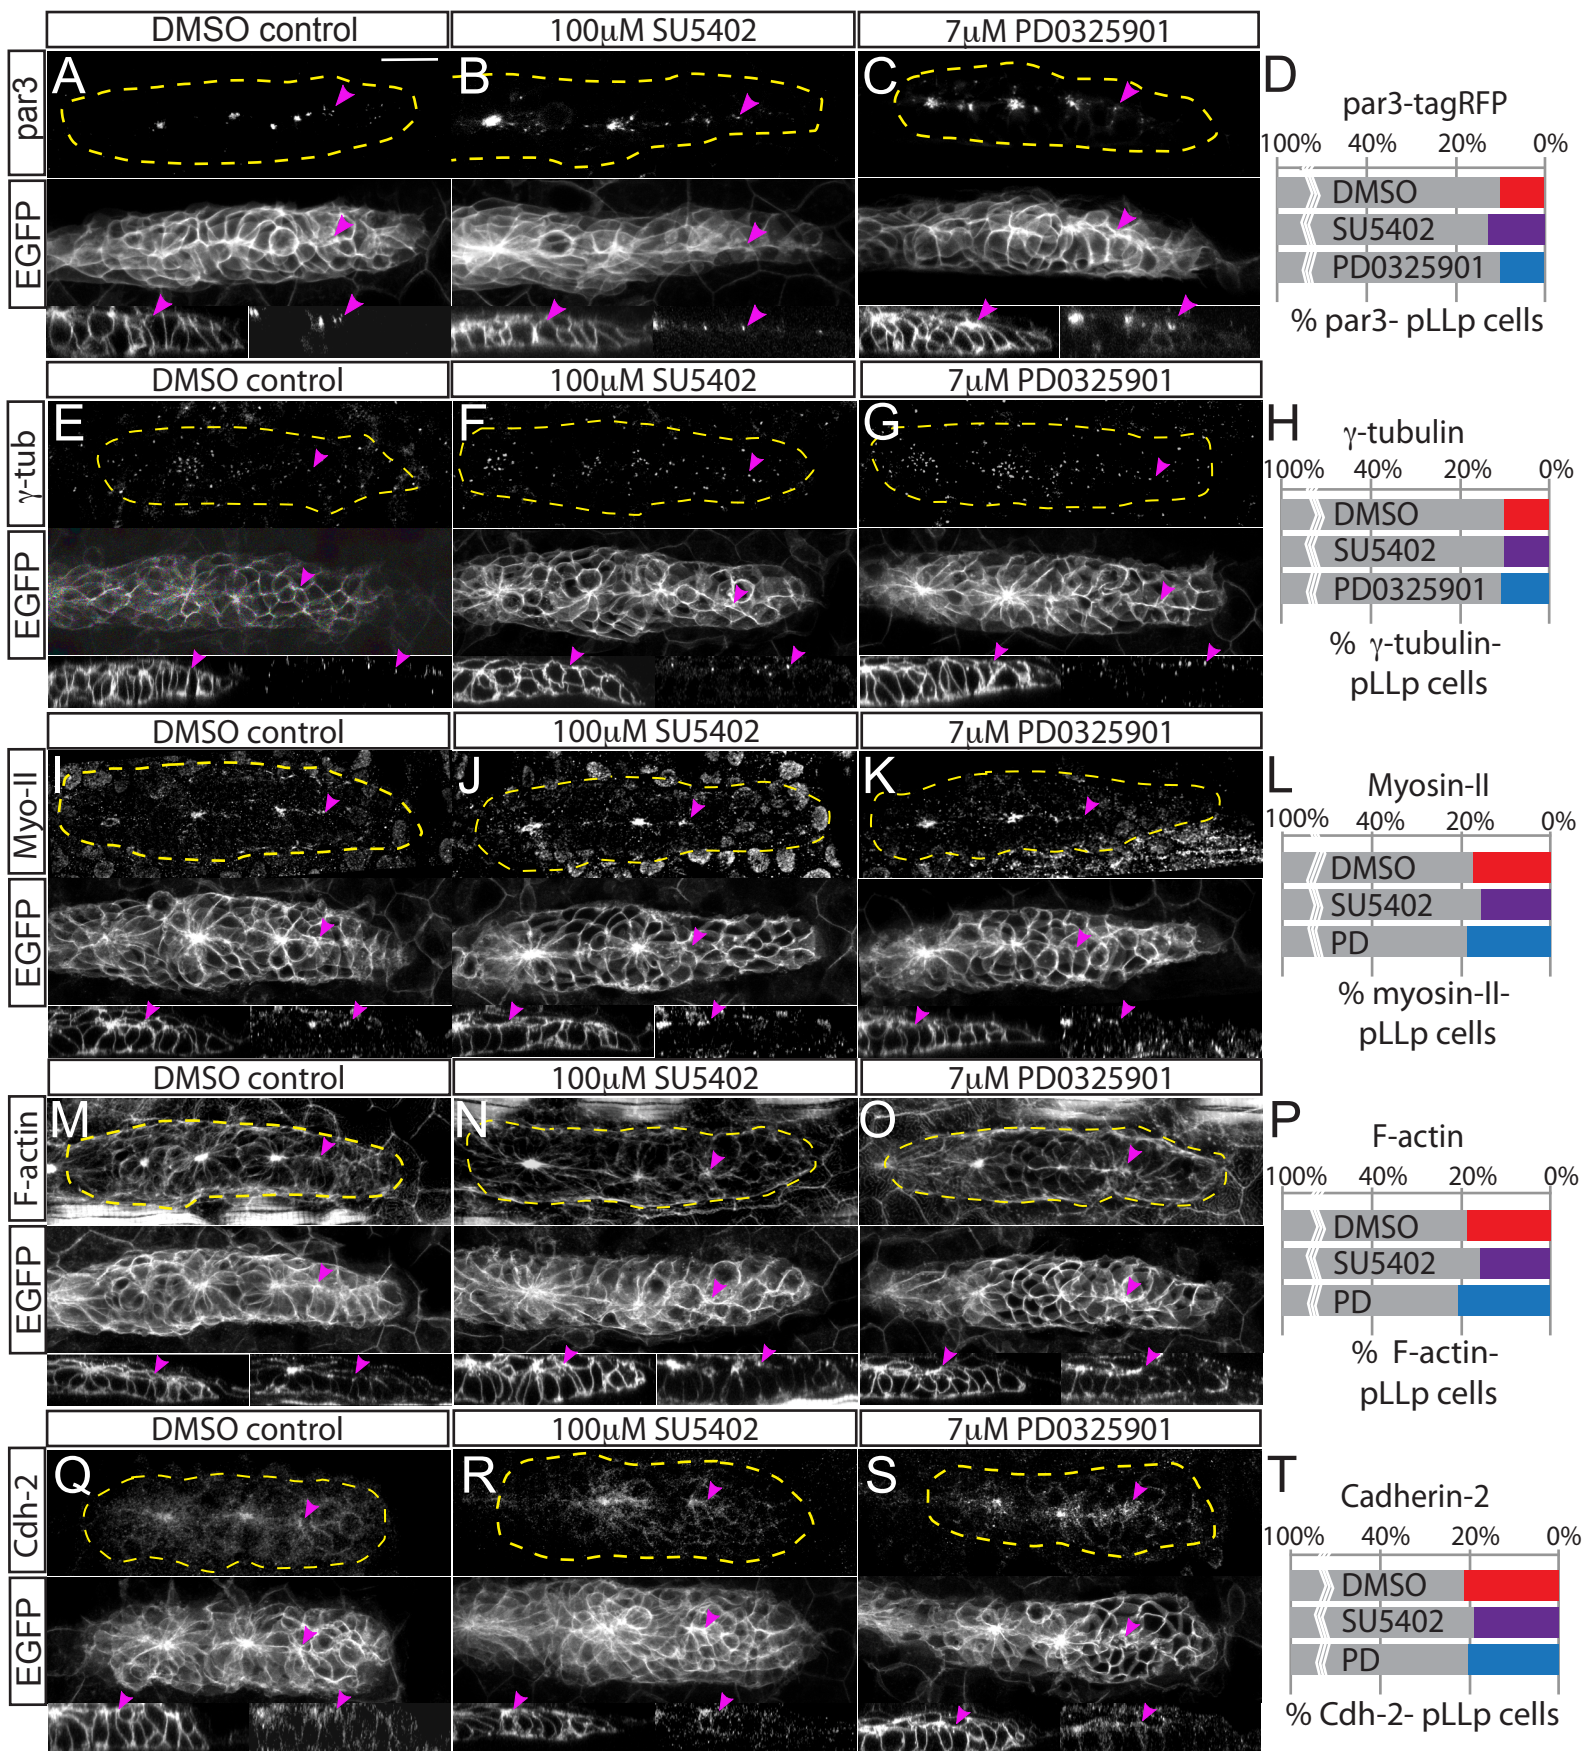

Supplement: supp_dev.082271_DEV082271FigS4.pdf [file supp_dev.082271_DEV082271FigS4.pdf]

30 hpf *rock2a*

A

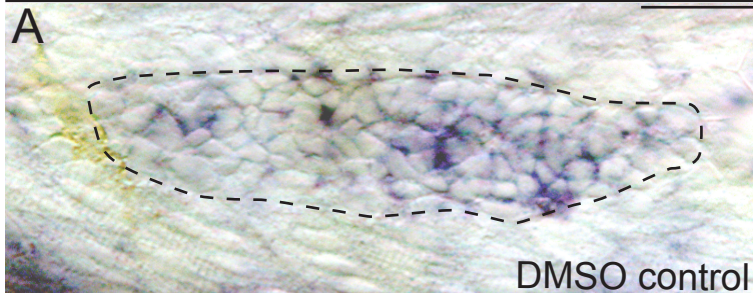

B

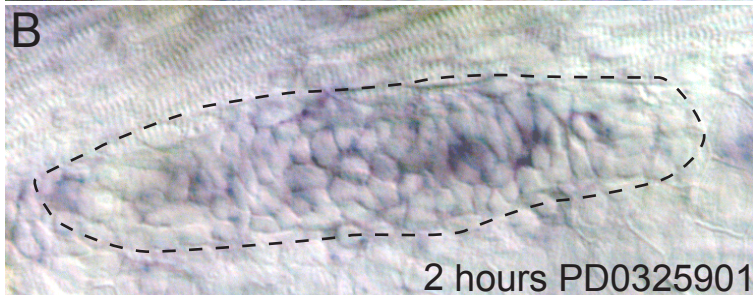

C

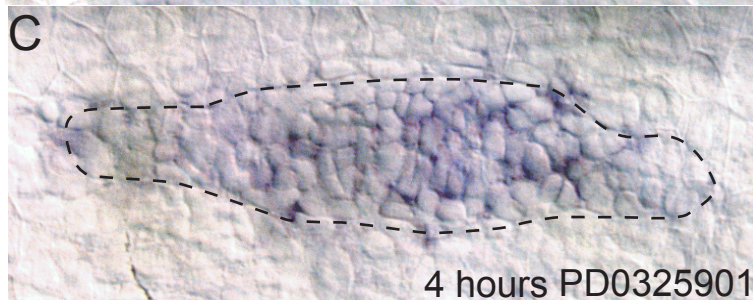

Supplement: supp_dev.082271_DEV082271FigS5.pdf [file supp_dev.082271_DEV082271FigS5.pdf]
